# Supplementary material for: Overlapping and distinct functions of CstF64 and CstF64τ in mammalian mRNA 3′ processing
Source: PubMed Central journal article supplement — RNA. 2013 Dec;19(12):1781–90. doi: 10.1261/rna.042317.113 (PMC3884657; doi:10.1261/rna.042317.113), 2013-12
Supplement: supp_042317.113_Table_S1-selex.pdf [file supp_042317.113_Table_S1-selex.pdf]

**Table S1. CstF64 and CstF64 $\tau$  Binding Motifs**

| Fold Enrichment | CstF64                                                                                                                                                 | CstF64 $\tau$                                                                                                                                           |
|-----------------|--------------------------------------------------------------------------------------------------------------------------------------------------------|---------------------------------------------------------------------------------------------------------------------------------------------------------|
| 0-0.1           | 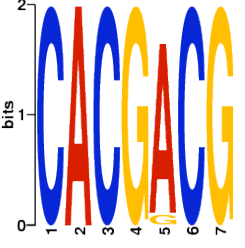 <p>MEME (no SSC)14.3.2013 11:12</p> <p><b>E-value: 7.9e-30</b></p>   |  <p>MEME (no SSC)17.6.2013 23:00</p> <p><b>E-value: 2.6e-17</b></p>   |
| 0.1-0.3         |  <p>MEME (no SSC)14.3.2013 10:49</p> <p><b>E-value: 1.3e-267</b></p> |  <p>MEME (no SSC)18.6.2013 06:45</p> <p><b>E-value: 5.7e-364</b></p> |
| 0.3-0.5         | <b>No Significant Motifs</b>                                                                                                                           | <b>No Significant Motifs</b>                                                                                                                            |
| 0.5-0.8         | <b>No Significant Motifs</b>                                                                                                                           | <b>No Significant Motifs</b>                                                                                                                            |
| 0.8-1.0         | <b>No Significant Motifs</b>                                                                                                                           | <b>No Significant Motifs</b>                                                                                                                            |
| 1.0-2.0         |  <p>MEME (no SSC)14.3.2013 11:18</p> <p><b>E-value: 8.4e-5</b></p>  |  <p>MEME (no SSC)18.6.2013 06:47</p> <p><b>E-value: 1.3e-28</b></p> |
| 2.0-3.0         |  <p>MEME (no SSC)14.3.2013 11:31</p> <p><b>E-value: 2.7e-16</b></p> |  <p>MEME (no SSC)18.6.2013 06:48</p> <p><b>E-value: 8.2e-15</b></p> |

|                  |                                                                  |                                                                   |
|------------------|------------------------------------------------------------------|-------------------------------------------------------------------|
|                  | <p>MEME (no SSG)14.3.2013.11.30<br/><b>E-value: 6.7e-8</b></p>   | <p>MEME (no SSG)18.6.2013.06.56<br/><b>E-value: 1.0e-11</b></p>   |
| <b>3.0-5.0</b>   | <p>MEME (no SSG)14.3.2013.11.20<br/><b>E-value: 8.2e-41</b></p>  | <p>MEME (no SSG)18.6.2013.06.50<br/><b>E-value: 4.1e-160</b></p>  |
| <b>5.0-10.0</b>  | <p>MEME (no SSG)14.3.2013.11.36<br/><b>E-value: 4.8e-72</b></p>  | <p>MEME (no SSG)18.6.2013.06.51<br/><b>E-value: 4.6e-157</b></p>  |
|                  | <p>MEME (no SSG)14.3.2013.11.37<br/><b>E-value: 3.7e-50</b></p>  |                                                                   |
| <b>10.0-20.0</b> | <p>MEME (no SSG)14.3.2013.11.21<br/><b>E-value: 3.2e-415</b></p> | <p>MEME (no SSG)18.6.2013.06.53<br/><b>E-value: 1.3e-1162</b></p> |

|                         |                                                                     |                                                                      |
|-------------------------|---------------------------------------------------------------------|----------------------------------------------------------------------|
| <p><b>20.0–30.0</b></p> | <p>MEME (no SSG) 4.3.2013 11.23</p> <p><b>E-value: 2.8e-405</b></p> | <p>MEME (no SSG) 17.6.2013 23.06</p> <p><b>E-value: 5.0e-376</b></p> |
| <p><b>30.0–40.0</b></p> | <p>MEME (no SSG) 4.3.2013 11.24</p> <p><b>E-value: 8.5e-147</b></p> | <p>MEME (no SSG) 17.6.2013 23.04</p> <p><b>E-value: 1.1e-116</b></p> |
| <p><b>40.0–50.0</b></p> | <p>MEME (no SSG) 4.3.2013 11.24</p> <p><b>E-value: 1.4e-28</b></p>  | <p>MEME (no SSG) 17.6.2013 22.57</p> <p><b>E-value: 2.6e-22</b></p>  |
| <p><b>50.0+</b></p>     | <p>MEME (no SSG) 4.3.2013 11.25</p> <p><b>E-value: 2.4-12</b></p>   | <p>MEME (no SSG) 17.6.2013 23.03</p> <p><b>E-value: 8.9e-1</b></p>   |
